# Supplementary material for: Regional Variation in Active Surveillance for Low-Risk Prostate Cancer in the US
Source: PubMed Central journal article supplement (PMC7770559; doi:10.1001/jamanetworkopen.2020.31349), 2020-12-28
Supplement: jamanetwopen-e2031349-s001.pdf [file jamanetwopen-e2031349-s001.pdf]

## Supplementary Online Content

Washington SL III, Jeong CW, Lonergan PE, et al. Regional variation in active surveillance for low-risk prostate cancer in the US. *JAMA Netw Open*. 2020;3(12):e2031349. doi:10.1001/jamanetworkopen.2020.31349

**eFigure 1.** Data Flow Diagram

**eFigure 2.** Nationwide Treatment Trends for Men With Low-Risk Prostate Cancer Excluding Unknown Treatments

**eFigure 3.** Treatment Trends for Men With Low-Risk Prostate Cancer by County Excluding Unknown Treatments

**eTable 1.** Characteristics of 5 Imputed Datasets

**eTable 2.** Average Annual Change in Percentage Points in the Proportion of Men Managed With AS/WW

This supplementary material has been provided by the authors to give readers additional information about their work.

**eFigure 1.** Data flow diagram

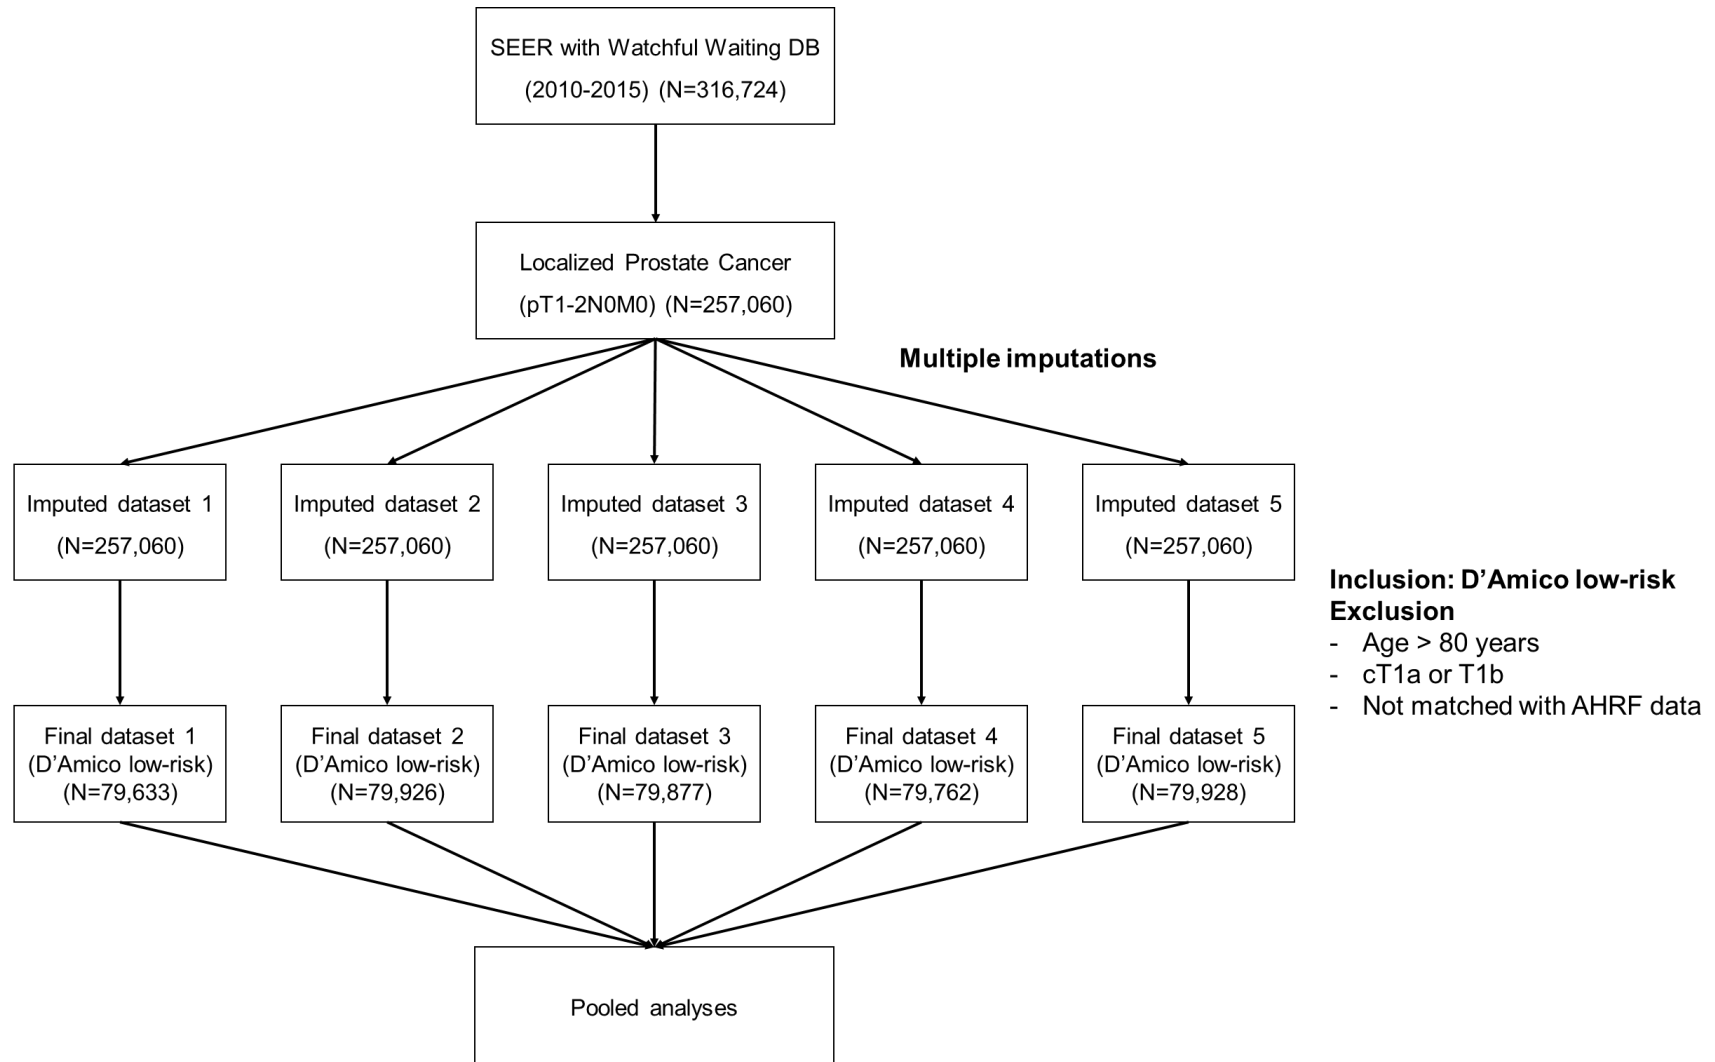

**eFigure 2. Nationwide treatment trends for men with low-risk prostate cancer excluding unknown treatments.**

The proportion of each treatment excluding unknown treatments in men with clinically localized, low-risk prostate cancer by SEER registry from 2010-2015.

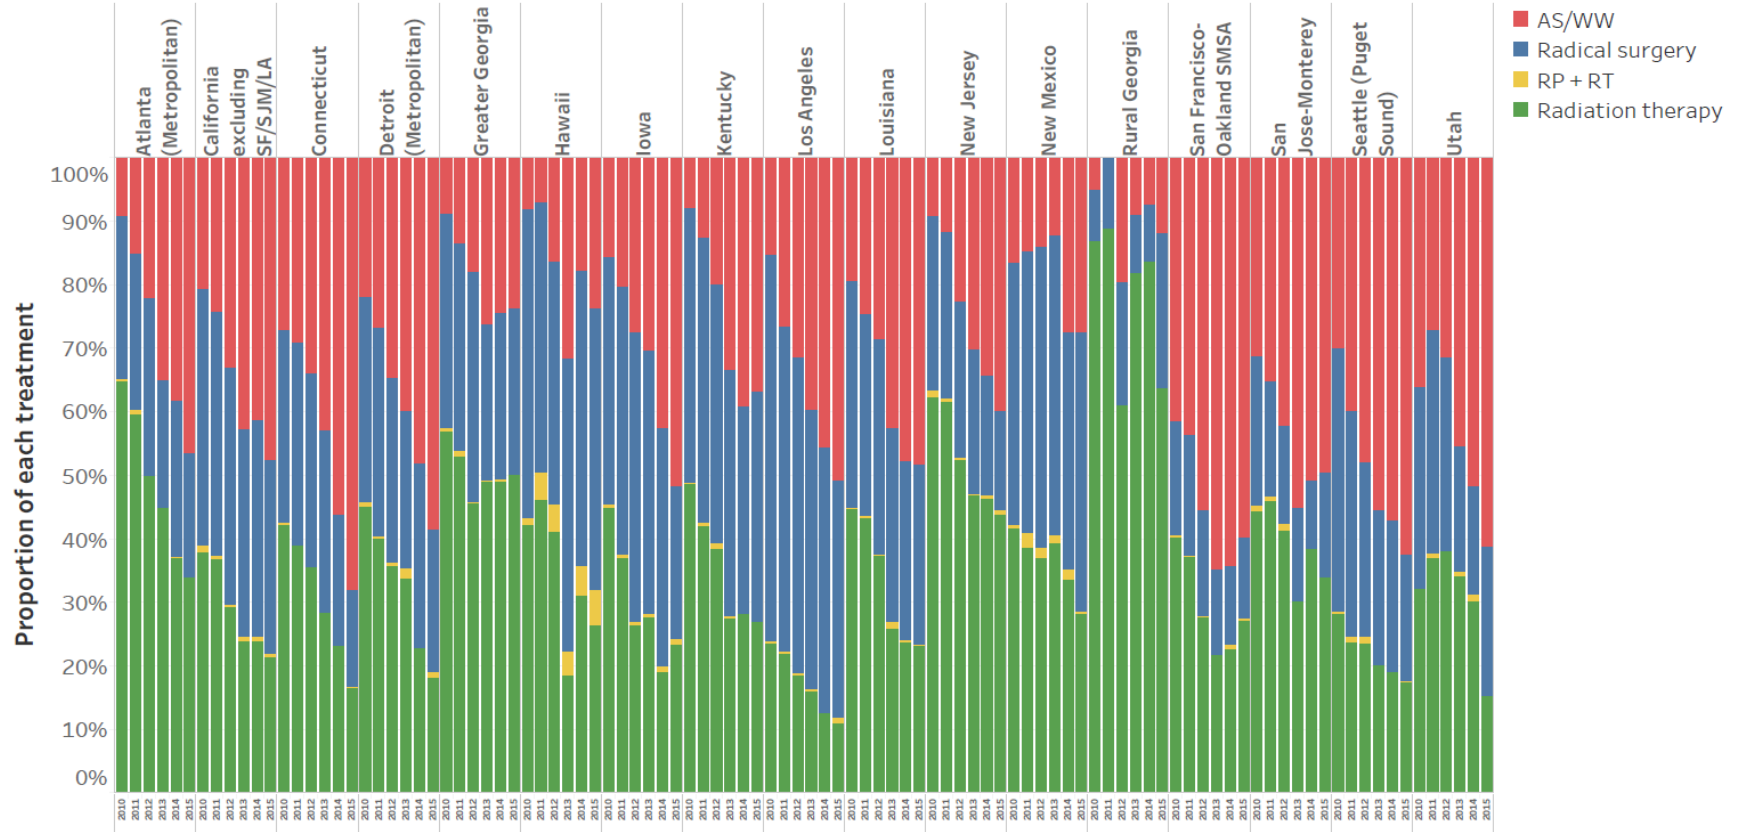

**eFigure 3. Treatment trends for men with low-risk prostate cancer by county excluding unknown treatments.**

The proportion of each treatment in men with clinically localized, low-risk prostate cancer by county within each SEER registry from 2010-2015.

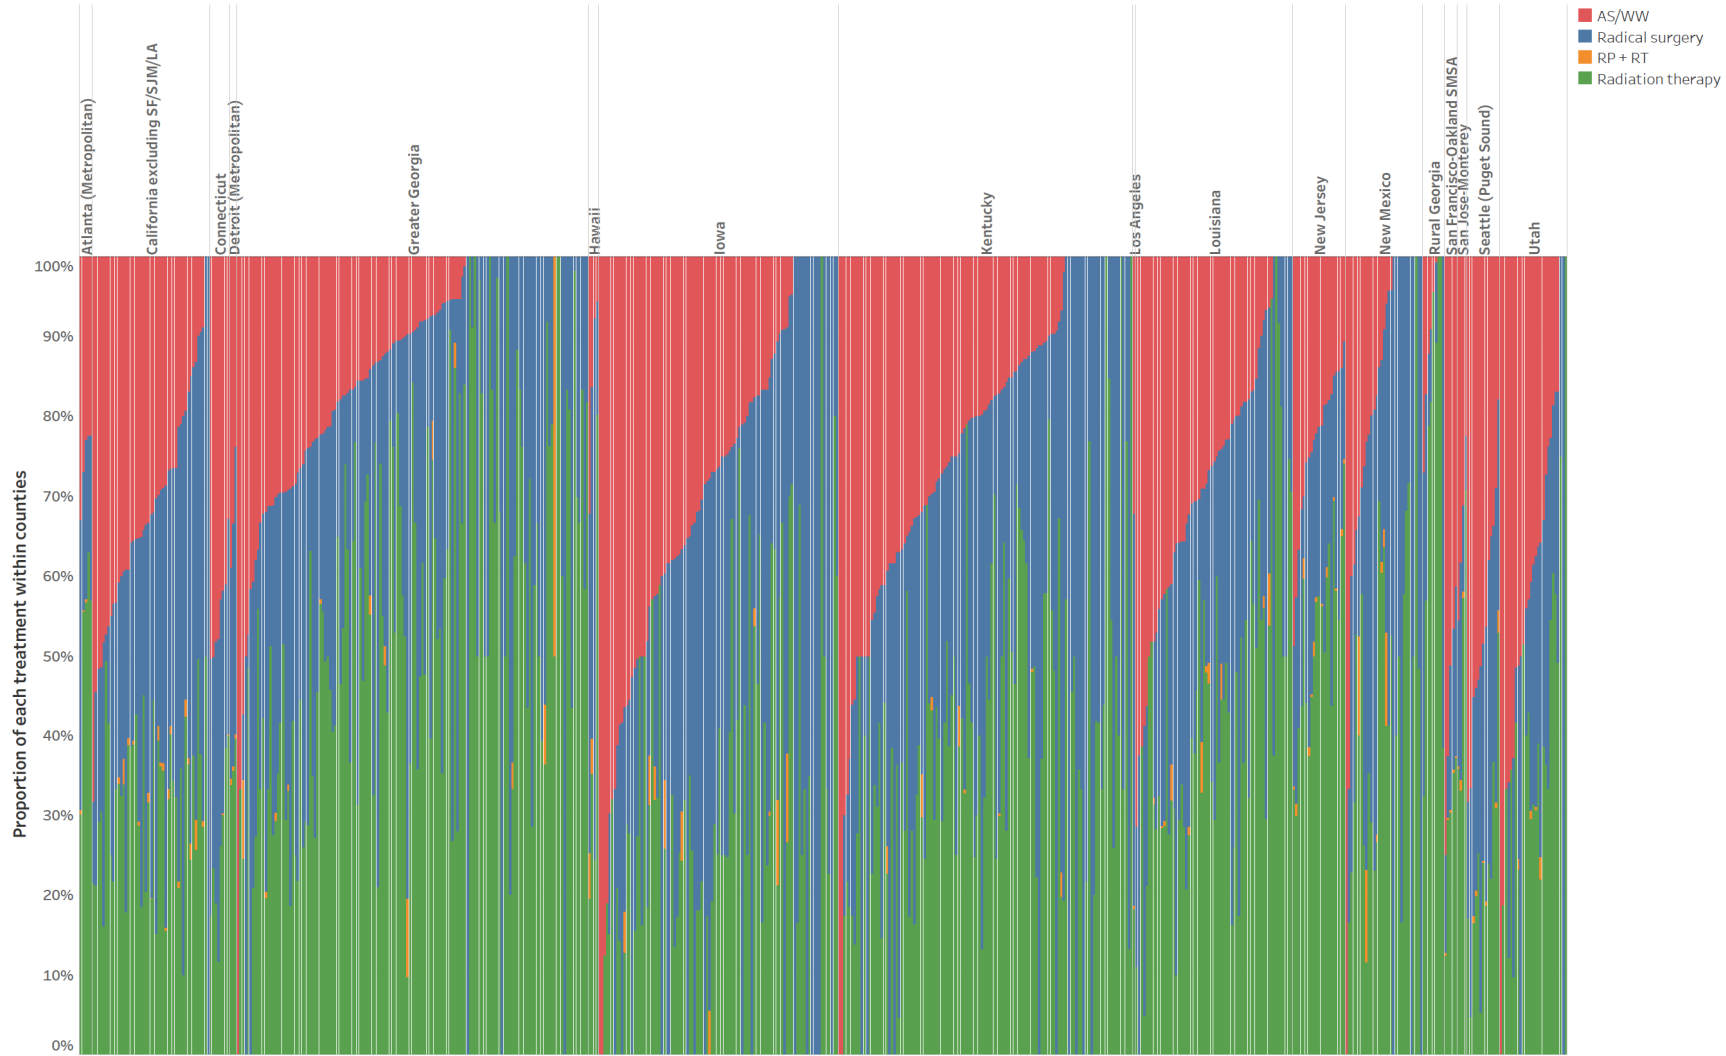

**eTable 1.** Characteristics of 5 imputed datasets

| Characteristics                | Dataset 1<br>(N=79,633) | Dataset 2<br>(N=79,926) | Dataset 3<br>(N=79,877) | Dataset 4<br>(N=79,762) | Dataset 5<br>(N=79,928) | p     |
|--------------------------------|-------------------------|-------------------------|-------------------------|-------------------------|-------------------------|-------|
| <b>Patient-level variables</b> |                         |                         |                         |                         |                         |       |
| <b>Treatment</b>               |                         |                         |                         |                         |                         | 0.981 |
| AS/WW                          | 17,553 (22.0)           | 17,638 (22.1)           | 17,603 (22.0)           | 17,691 (22.2)           | 17,701 (22.1)           |       |
| Active Treatment               | 46,178 (58.0)           | 46,332 (58.0)           | 46,259 (57.9)           | 46,267 (58.0)           | 46,248 (57.9)           |       |
| Other/Unknown                  | 15,902 (20.0)           | 15,956 (20.0)           | 16,015 (20.0)           | 15,804 (19.8)           | 15,979 (20.0)           |       |
| <b>Age, y (mean ± SD)</b>      | 62.7 ± 7.6              | 62.8 ± 7.6              | 62.8 ± 7.6              | 62.8 ± 7.6              | 62.8 ± 7.6              | 0.146 |
| <b>Age, y</b>                  |                         |                         |                         |                         |                         | 0.896 |
| <50                            | 4,753 (6.0)             | 4,703 (5.9)             | 4,731 (5.9)             | 4,739 (5.9)             | 4,734 (5.9)             |       |
| 51-60                          | 25,426 (31.9)           | 25,417 (31.8)           | 25,395 (31.8)           | 25,389 (31.8)           | 25,370 (31.7)           |       |
| 61-70                          | 36,964 (46.4)           | 36,982 (46.3)           | 36,967 (46.3)           | 36,837 (46.2)           | 37,007 (46.3)           |       |
| 71-80                          | 12,490 (15.7)           | 12,824 (16.0)           | 12,784 (16.0)           | 12,797 (16.0)           | 12,817 (16.0)           |       |
| <b>Race/ethnicity</b>          |                         |                         |                         |                         |                         | 1.000 |
| Non-Hispanic White             | 55,228 (69.4)           | 55,519 (69.5)           | 55,376 (69.3)           | 55,424 (69.5)           | 55,488 (69.4)           |       |
| Non-Hispanic Black             | 11,321 (14.2)           | 11,280 (14.1)           | 11,327 (14.2)           | 11,252 (14.1)           | 11,281 (14.1)           |       |
| Hispanic                       | 7,476 (9.4)             | 7,498 (9.4)             | 7,529 (9.4)             | 7,490 (9.4)             | 7,535 (9.4)             |       |
| Asian/Pacific islander         | 3,154 (4.0)             | 3,195 (4.0)             | 3,192 (4.0)             | 3,190 (4.0)             | 3,183 (4.0)             |       |

|                                            |               |               |               |               |               |       |
|--------------------------------------------|---------------|---------------|---------------|---------------|---------------|-------|
| Other/Unknown                              | 2,454 (3.1)   | 2,434 (3.0)   | 2,453 (3.1)   | 2,406 (3.0)   | 2,441 (3.1)   |       |
| <b>Health insurance status</b>             |               |               |               |               |               | 0.951 |
| Private and/or Medicare                    | 74,744 (93.9) | 75,011 (93.9) | 75,065 (94.0) | 74,855 (93.8) | 75,035 (93.9) |       |
| Medicaid                                   | 3,534 (4.4)   | 3,533 (4.4)   | 3,465 (4.3)   | 3,522 (4.4)   | 3,553 (4.4)   |       |
| Uninsured/unknown                          | 1,355 (1.7)   | 1,382 (1.7)   | 1,347 (1.7)   | 1,385 (1.7)   | 1,340 (1.7)   |       |
| <b>Marital status</b>                      |               |               |               |               |               | 0.980 |
| Married                                    | 60,905 (76.5) | 61,188 (76.6) | 61,196 (76.6) | 61,084 (76.6) | 61,174 (76.5) |       |
| Single                                     | 18,728 (23.5) | 18,738 (23.4) | 18,681 (23.4) | 18,678 (23.4) | 18,754 (23.5) |       |
| <b>Year of diagnosis</b>                   |               |               |               |               |               | 1.000 |
| 2010                                       | 17,011 (21.4) | 17,083 (21.4) | 17,110 (21.4) | 17,080 (21.4) | 17,140 (21.4) |       |
| 2011                                       | 17,167 (21.6) | 17,212 (21.5) | 17,226 (21.6) | 17,216 (21.6) | 17,226 (21.6) |       |
| 2012                                       | 13,394 (16.8) | 13,481 (16.9) | 13,482 (16.9) | 13,470 (16.9) | 13,476 (16.9) |       |
| 2013                                       | 12,173 (15.3) | 12,146 (15.2) | 12,164 (15.2) | 12,117 (15.2) | 12,141 (15.2) |       |
| 2014                                       | 10,043 (12.6) | 10,159 (12.7) | 10,063 (12.6) | 10,093 (12.7) | 10,104 (12.6) |       |
| 2015                                       | 9,845 (12.4)  | 9,845 (12.3)  | 9,832 (12.3)  | 9,786 (12.3)  | 9,841 (12.3)  |       |
| <b>PSA at diagnosis, ng/ml (mean ± SD)</b> | 5.5 ± 1.9     | 5.5 ± 1.9     | 5.5 ± 1.9     | 5.5 ± 1.9     | 5.5 ± 1.9     | 0.942 |
| <b>Clinical T stage, n (%)</b>             |               |               |               |               |               | 0.939 |
| T1c                                        | 66,554 (83.6) | 66,811 (83.6) | 66,864 (83.7) | 66,752 (83.7) | 66,855 (83.6) |       |
| T2a                                        | 13,079 (16.4) | 13,115 (16.4) | 13,013 (16.3) | 13,010 (16.3) | 13,073 (16.4) |       |

|                                             |                           |                           |                           |                           |                           |       |
|---------------------------------------------|---------------------------|---------------------------|---------------------------|---------------------------|---------------------------|-------|
| <b>Percentage biopsy positive cores</b>     |                           |                           |                           |                           |                           | 0.990 |
| <33%                                        | 52,102 (65.4)             | 52,237 (65.4)             | 52,259 (65.4)             | 52,224 (65.5)             | 52,306 (65.4)             |       |
| ≥33%, <50%                                  | 15,241 (19.1)             | 15,333 (19.2)             | 15,258 (19.1)             | 15,283 (19.2)             | 15,388 (19.3)             |       |
| ≥50%                                        | 12,290 (15.4)             | 12,356 (15.5)             | 12,360 (15.5)             | 12,255 (15.4)             | 12,234 (15.3)             |       |
| <b>Follow-up, months (mean ± SD)</b>        | 38.7 ± 20.4               | 38.7 ± 20.4               | 38.7 ± 20.4               | 38.7 ± 20.4               | 38.7 ± 20.4               | 0.994 |
| <b>Follow-up, months (median, [IQR])</b>    | 40 (22-56)                | 40 (22-56)                | 40 (22-56)                | 40 (22-56)                | 40 (22-56)                | 0.994 |
| <b>County-level variables</b>               |                           |                           |                           |                           |                           |       |
| <b>City type, population</b>                |                           |                           |                           |                           |                           |       |
| Metropolitan, ≥1 million                    | 50,802 (63.8)             | 51,020 (63.8)             | 50,971 (63.8)             | 50,879 (63.8)             | 50,960 (63.8)             |       |
| Metropolitan, 250k – 1 million              | 15,126 (19.0)             | 15,141 (18.9)             | 15,162 (19.0)             | 15,132 (19.0)             | 15,190 (19.0)             |       |
| Metropolitan, <250k                         | 5,891 (7.4)               | 5,944 (7.4)               | 5,944 (7.4)               | 5,934 (7.4)               | 5,979 (7.5)               |       |
| Urban, ≥20k                                 | 2,936 (3.7)               | 2,937 (3.7)               | 2,900 (3.6)               | 2,924 (3.7)               | 2,911 (3.6)               |       |
| Urban, 2,500-19,999                         | 4,027 (5.1)               | 4,024 (5.0)               | 4,032 (5.0)               | 4,033 (5.1)               | 4,015 (5.0)               |       |
| Rural/Urban, <2,500                         | 851 (1.1)                 | 860 (1.1)                 | 868 (1.1)                 | 860 (1.1)                 | 873 (1.1)                 |       |
| <b>Household income, \$ (median, [IQR])</b> | 68611.0 [60203.0;86003.0] | 68611.0 [60203.0;86003.0] | 68611.0 [60203.0;86003.0] | 68611.0 [60203.0;86366.0] | 68611.0 [60203.0;86366.0] | 0.995 |
| <b>Median education per 100k</b>            |                           |                           |                           |                           |                           |       |
| < HS diploma (median, [IQR])                | 13,024 (10,204-17,690)    | 13,024 (10,236-17,824)    | 13,024 (10,236-17,690)    | 13,024 (10,236-17,690)    | 13,024 (10,236-17,690)    | 0.013 |
| HS diploma or more (median, [IQR])          | 86,976 (82,310-89,797)    | 86,976 (82,176-89,764)    | 86,976 (82,310-89,764)    | 86,976 (82,310-89,764)    | 86,976 (82,310_89,764)    | 0.062 |

|                                                          |                        |                        |                        |                        |                        |       |
|----------------------------------------------------------|------------------------|------------------------|------------------------|------------------------|------------------------|-------|
| 4+ years of college (median, [IQR])                      | 30,347 (22,683-38,043) | 30,347 (22,683-38,043) | 30,347 (22,683-38,043) | 30,347 (22,683-38,043) | 30,347 (22,683-38,043) | 0.291 |
| <b>Urologists per 100k, n</b> (median, [IQR])            | 3.1 (1.9-4.3)          | 3.1 (1.9-4.3)          | 3.1 (1.9-4.3)          | 3.1 (1.9-4.3)          | 3.1 (1.9-4.3)          | 0.336 |
| <b>Radiation oncologists per 100k, n</b> (median, [IQR]) | 1.5 (0.7-2.1)          | 1.5 (0.7-2.1)          | 1.5 (0.7-2.1)          | 1.5 (0.7-2.1)          | 1.5 (0.7-2.1)          | 0.389 |
| <b>PCPs per 100k, n</b> (median, [IQR])                  | 75.5 (58.8-97.6)       | 75.3 (58.6-97.6)       | 75.5 (58.8-97.6)       | 75.5 (58.8-97.6)       | 75.5 (58.8-97.6)       | 0.429 |
| <b>Hospital beds per 100k, n</b> (median, [IQR])         | 228.6 (172.6-325.7)    | 228.6 (172.6-323.6)    | 228.6 (172.6-325.7)    | 228.6 (172.6-325.7)    | 228.6 (172.6-325.7)    | 0.009 |
| <b>Regional variables</b>                                |                        |                        |                        |                        |                        |       |
| <b>SEER Registry</b>                                     |                        |                        |                        |                        |                        | 1.000 |
| Atlanta (Metropolitan)                                   | 3,264 (4.1)            | 3,286 (4.1)            | 3,283 (4.1)            | 3,239 (4.1)            | 3,292 (4.1)            |       |
| California excluding SF/SJM/LA                           | 16,336 (20.5)          | 16,416 (20.5)          | 16,394 (20.5)          | 16,409 (20.6)          | 16,389 (20.5)          |       |
| Connecticut                                              | 3,747 (4.7)            | 3,737 (4.7)            | 3,752 (4.7)            | 3,736 (4.7)            | 3,737 (4.7)            |       |
| Detroit (Metropolitan)                                   | 4,357 (5.5)            | 4,339 (5.4)            | 4,325 (5.4)            | 4,362 (5.5)            | 4,346 (5.4)            |       |
| Greater Georgia                                          | 6,679 (8.4)            | 6,663 (8.3)            | 6,665 (8.3)            | 6,645 (8.3)            | 6,615 (8.3)            |       |
| Hawaii                                                   | 644 (0.8)              | 633 (0.8)              | 645 (0.8)              | 652 (0.8)              | 645 (0.8)              |       |
| Iowa                                                     | 2,075 (2.6)            | 2,088 (2.6)            | 2,083 (2.6)            | 2,069 (2.6)            | 2,089 (2.6)            |       |
| Kentucky                                                 | 3,971 (5.0)            | 3,981 (5.0)            | 3,984 (5.0)            | 3,968 (5.0)            | 3,975 (5.0)            |       |
| Los Angeles                                              | 6,501 (8.2)            | 6,542 (8.2)            | 6,522 (8.2)            | 6,515 (8.2)            | 6,520 (8.2)            |       |
| Louisiana                                                | 5,566 (7.0)            | 5,577 (7.0)            | 5,598 (7.0)            | 5,588 (7.0)            | 5,655 (7.1)            |       |
| New Jersey                                               | 11,545 (14.5)          | 11,602 (14.5)          | 11,655 (14.6)          | 11,624 (14.6)          | 11,636 (14.6)          |       |
| New Mexico                                               | 1,425 (1.8)            | 1,416 (1.8)            | 1,423 (1.8)            | 1,414 (1.8)            | 1,432 (1.8)            |       |



|                            |             |             |             |             |             |  |
|----------------------------|-------------|-------------|-------------|-------------|-------------|--|
| Rural Georgia              | 173 (0.2)   | 174 (0.2)   | 171 (0.2)   | 170 (0.2)   | 173 (0.2)   |  |
| San Francisco-Oakland SMSA | 4,551 (5.7) | 4,583 (5.7) | 4,598 (5.8) | 4,586 (5.7) | 4,599 (5.8) |  |
| San Jose-Monterey          | 2,639 (3.3) | 2,653 (3.3) | 2,642 (3.3) | 2,640 (3.3) | 2,659 (3.3) |  |
| Seattle (Puget Sound)      | 4,189 (5.3) | 4,220 (5.3) | 4,172 (5.2) | 4,133 (5.2) | 4,183 (5.2) |  |
| Utah                       | 1,971 (2.5) | 2,016 (2.5) | 1,965 (2.5) | 2,012 (2.5) | 1,983 (2.5) |  |

**eTable 2. Average annual change in percentage points in the proportion of men managed with AS/WW**

| Registry                       | AS rate in 2010 | AS rate in 2015 | Mean annual increase in AS rate | Mean annual % increase in AS rate |
|--------------------------------|-----------------|-----------------|---------------------------------|-----------------------------------|
| Atlanta (Metropolitan)         | 6.7             | 28.9            | 4.4                             | 67%                               |
| California excluding SF/SJM/LA | 12.7            | 34.0            | 4.3                             | 34%                               |
| Connecticut                    | 18.4            | 51.5            | 6.6                             | 36%                               |
| Detroit (Metropolitan)         | 13.9            | 26.8            | 2.6                             | 19%                               |
| Greater Georgia                | 5.1             | 14.2            | 1.8                             | 36%                               |
| Hawaii                         | 4.9             | 15.8            | 2.2                             | 45%                               |
| Iowa                           | 10.7            | 40.3            | 5.9                             | 55%                               |
| Kentucky                       | 5.2             | 24.6            | 3.9                             | 75%                               |
| Los Angeles                    | 10.7            | 38.5            | 5.5                             | 52%                               |
| Louisiana                      | 11.8            | 31.2            | 3.9                             | 33%                               |
| New Jersey                     | 5.9             | 29.7            | 4.8                             | 81%                               |
| New Mexico                     | 9.5             | 12.5            | 0.6                             | 6%                                |
| Rural Georgia                  | 2.3             | 6.6             | 0.9                             | 37%                               |
| San Francisco-Oakland SMSA     | 32.3            | 44.6            | 2.4                             | 8%                                |
| San Jose-Monterey              | 23.8            | 43.8            | 4.0                             | 17%                               |
| Seattle (Puget Sound)          | 18.4            | 42.0            | 4.7                             | 26%                               |
| Utah                           | 23.8            | 39.4            | 3.1                             | 13%                               |
